# Supplementary material for: Gallium Trichloride Fluid: Dimer Dissociation Mechanism, Local Structure, and Atomic Dynamics
Source: MDPI journal article supplement (doi:10.3390/molecules29061358), 2024-03-19
Supplement: s1 [file s1]

# Gallium Trichloride Fluid: Dimer Dissociation Mechanism, Local Structure, and Atomic Dynamics

Maxim Khomenko <sup>1,2</sup>, Anton Sokolov <sup>3</sup>, Andrey Tverjanovich <sup>4</sup>, Maria Bokova <sup>3</sup>,  
Mohammad Kassem <sup>3</sup>, Takeshi Usuki <sup>5</sup> and Eugene Bychkov <sup>3,\*</sup>

<sup>1</sup> National Research Centre, Kurchatov Institute, Shatura, Moscow 140700, Russia;  
khomenkolaser@gmail.com

<sup>2</sup> Laboratory of Biophotonics, Tomsk State University, Tomsk 634050, Russia

<sup>3</sup> Laboratoire de Physico-Chimie de L'atmosphère, Université du Littoral Côte d'Opale,  
59140 Dunkerque, France; anton.sokolov@univ-littoral.fr (A.S.);  
maria.bokova@univ-littoral.fr (M.B.); mohamad.kassem@univ-littoral.fr (M.K.)

<sup>4</sup> Institute of Chemistry, St. Petersburg State University, St. Petersburg 198504, Russia;  
andr.tver@yahoo.com

<sup>5</sup> Faculty of Science, Yamagata University, Yamagata 990-8560, Japan;  
usuki@kdw.kj.yamagata-u.ac.jp

\* Correspondence: eugene.bychkov@univ-littoral.fr

## SUPPORTING INFORMATION

### Dissociation Reaction: Calculation Details

**Figure S1.** Mean-square displacements in normal liquid GaCl<sub>3</sub> at 400 K.

**Figure S2.** Experimental and FPMD-derived viscosity for molten GaCl<sub>3</sub>.

## Dissociation Reaction: Calculation Details

Let us consider the dissociation reaction:

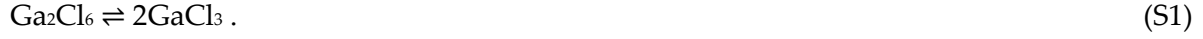

The equilibrium constant, based on reported partial pressures<sup>S1</sup> (the insert in Figure 1a), can be written as

$$K_p = \frac{P_{\text{GaCl}_3}^2}{P_{\text{Ga}_2\text{Cl}_6}} . \quad (\text{S2})$$

The equilibrium constant, representing the molar fractions, is given by

$$K_m = \frac{x_{\text{GaCl}_3}^2}{x_{\text{Ga}_2\text{Cl}_6}} = \frac{K_p}{P_{\text{total}}} . \quad (\text{S3})$$

Solving the quadratic equation relating  $K_m$  and  $x_{\text{GaCl}_3}$  and taking into account that  $x_{\text{Ga}_2\text{Cl}_6} + x_{\text{GaCl}_3} = 1$ , one obtains the monomer molar fraction  $x_{\text{GaCl}_3}$  as a function of temperature for unsaturated vapor (Figure 1b).

The equilibrium constant depends on the total pressure in the system

$$\frac{d \ln K_m}{dP} = - \frac{1}{P_{\text{total}}} . \quad (\text{S4})$$

By calculating  $x_{\text{GaCl}_3}$  at  $P_{\text{total}} = P_c$  and  $P_{\text{total}} = 3P_c$ , one observes a decreasing monomer molar fraction (Figure 1b), consistent with the experimental and FPMD results.

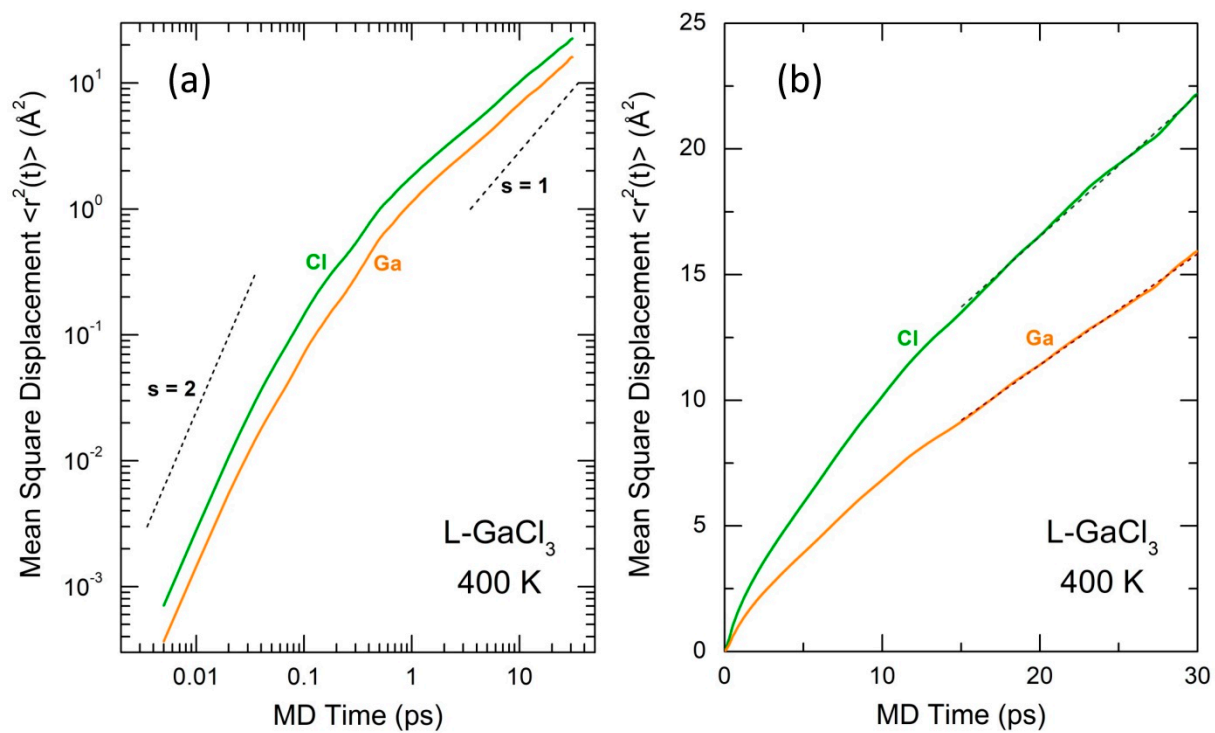

**Figure S1.** Mean-square displacements in normal liquid GaCl<sub>3</sub> at 400 K: (a) log-log scale, (b) linear scale. The slopes for ballistic regime ( $s = 2$ ) and diffusion regime ( $s = 1$ ) are shown in (a).

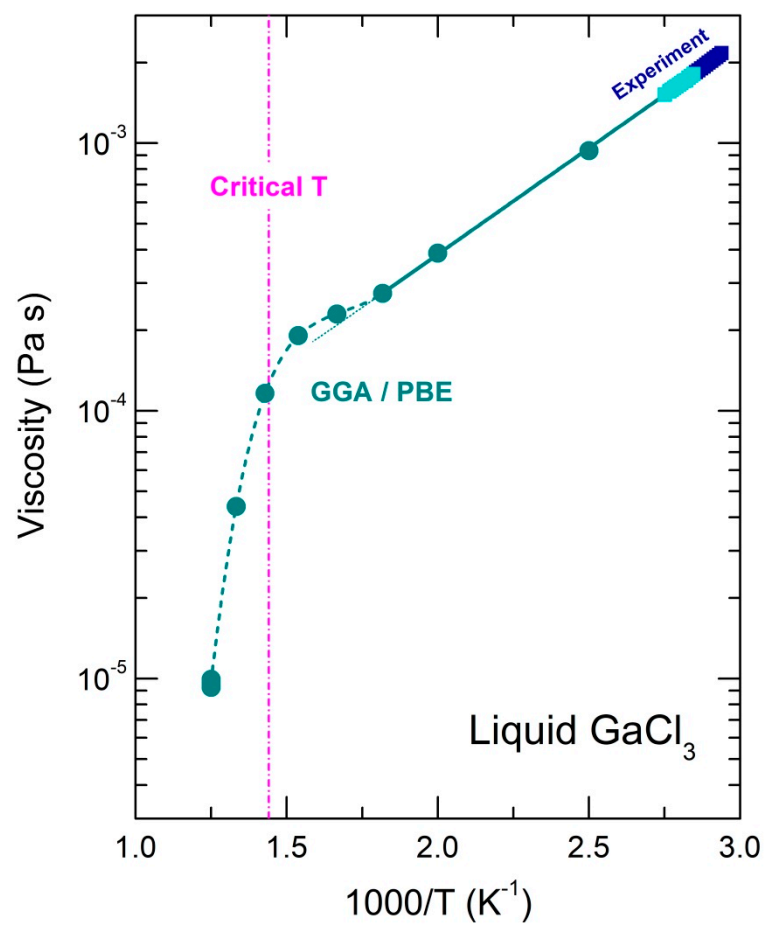

**Figure S2.** Experimental<sup>S2</sup> and FPMD-derived viscosity for molten GaCl<sub>3</sub>.

### Additional References

- S1. Fischer, W.; Jübermann, O. Über thermische Eigenschaften von Halogeniden. 10. Dampfdrucke und Dampfdichten von Gallium III – Halogeniden. *Z. Anorg. Allg. Chem.* **1936**, 227, 227–236.
- S2. Greenwood, N. N.; Wade, K. Some Physical Properties of Molten and Supercooled Gallium Trichloride. *J. Inorg. Nucl. Chem.* **1957**, 3, 349–356.
